# Supplementary material for: Marker Genes Change of Synovial Fibroblasts in Rheumatoid Arthritis Patients
Source: Biomed Res Int. 2021 Jun 4;2021:5544264. doi: 10.1155/2021/5544264 (PMC8203351; doi:10.1155/2021/5544264)
Supplement: Supplementary Materials — Table S1: the differentially expressed genes between RA patients and OA patients in GSE56409. [file 5544264.f1.txt]

Symbol	logFC	AveExpr	t	P.Value	adj.P.Val	B
EMB	3.113187338	6.40754866	7.107234261	4.33E-08	0.000940547	8.253163613
MCTP2	1.918509261	4.717653286	6.745703133	1.21E-07	0.001165188	7.346570793
TNS3	1.506863971	8.820791675	6.620153211	1.73E-07	0.001165188	7.028026678
LINC00623	1.254854056	8.513508508	6.35133049	3.76E-07	0.001633459	6.340174877
FAM89A	1.255619816	5.387550534	6.252933598	4.99E-07	0.001763034	6.086587071
AC242842.2	1.006195909	8.548713557	6.188328123	6.02E-07	0.001763034	5.919602653
AC241377.3	1.030358215	8.30854279	6.162693634	6.49E-07	0.001763034	5.853244135
ITGB3	-1.405331353	6.263315964	-5.973536436	1.12E-06	0.00264472	5.361927384
COL8A1	1.94509298	9.840179314	5.543050107	3.95E-06	0.002864152	4.235062768
MCTP2	2.137736075	4.125280881	5.412959214	5.78E-06	0.003686394	3.89291051
SYDE1	1.109409305	5.466211618	5.318928519	7.62E-06	0.004357117	3.64534864
FOXC1	1.238484546	6.782046888	5.217925015	1.02E-05	0.005427112	3.379304539
STEAP1	1.282521802	10.22401552	5.149280915	1.25E-05	0.006276365	3.1984777
LINC00623	1.228061347	9.560697274	5.122240318	1.35E-05	0.006392195	3.127251236
CHDH	1.236750758	5.93441787	5.12216442	1.35E-05	0.006392195	3.127051324
NRP2	1.400017756	6.167199164	5.115275543	1.38E-05	0.006392195	3.108906614
PARP8	1.392701731	4.448372866	5.080356783	1.53E-05	0.006776328	3.016941669
VAMP8	1.861181152	4.169961736	5.074146625	1.56E-05	0.006776328	3.000587739
BRINP1	2.380982769	6.316494451	5.042936272	1.71E-05	0.007137911	2.918407154
CCL2	2.048609059	9.520253504	4.896515571	2.62E-05	0.010737879	2.533168715
HTRA3	-1.537446614	4.795530403	-4.845034979	3.04E-05	0.012245136	2.397890066
HOXC11	-1.096913046	5.687131201	-4.78064138	3.67E-05	0.013632667	2.22884556
STEAP2	1.387398273	9.107378711	4.7777473	3.70E-05	0.013632667	2.221252957
TNXA	-1.457043305	6.145821282	-4.743334887	4.09E-05	0.014816462	2.131007255
NCALD	-1.638824163	6.187101748	-4.655998834	5.27E-05	0.018477813	1.902292187
GPR88	3.3953583	4.071964954	4.619896618	5.85E-05	0.018984984	1.807899511
COL8A1	1.62657232	6.179235253	4.610525639	6.01E-05	0.018984984	1.783414065
TNXA	-1.305508077	8.338540858	-4.609757376	6.03E-05	0.018984984	1.781406968
HTR2A	2.229617016	4.026671961	4.594892681	6.29E-05	0.019467937	1.742581831
NRP2	1.498461925	6.9097753	4.520454195	7.80E-05	0.022615417	1.548430033
LOXL4	1.048179325	8.414920127	4.495526638	8.38E-05	0.023122005	1.483522922
TNXA	-1.325115292	8.400959276	-4.47858122	8.80E-05	0.023630984	1.439433402
AC027288.3	1.942386488	3.665459631	4.403064362	0.00010944	0.02866657	1.243300331
RBPMS2	1.253098686	5.754206129	4.375375655	0.000118509	0.030672634	1.171539709
ENPP1	1.007939902	6.227474474	4.37080779	0.000120075	0.030712272	1.159709511
PPP1R14C	-1.015609722	8.823282507	-4.331641892	0.000134365	0.033967705	1.058374635
LSP1P4	-1.099602545	5.496675648	-4.281621093	0.000155073	0.036646021	0.929226395
SCG2	2.417157446	5.10344145	4.267590204	0.000161425	0.03726342	0.893057526
CYB561	-1.089067135	7.037874763	-4.26456722	0.000162827	0.03726342	0.885268255
ECHDC3	2.580601587	3.136766915	4.260111274	0.000164915	0.037348181	0.873788907
LIF	1.696882014	3.983806213	4.247442939	0.000170997	0.037552046	0.841167432
KCNE4	1.112013272	8.91021843	4.242795935	0.000173283	0.03767349	0.829206642
TNXA	-1.135566215	8.491756205	-4.235231214	0.000177069	0.038115341	0.80974233
AC024560.4	1.047426569	6.977013035	4.219353251	0.000185281	0.039401785	0.768913439
NRP2	1.436590145	5.647422352	4.207392744	0.000191713	0.040077163	0.738181305
NEFH	1.266506984	3.878487312	4.199999148	0.000195798	0.040158904	0.719193877
PODXL	-2.218144534	8.329684916	-4.192281046	0.000200154	0.040426866	0.699381474
ZNF385B	2.767828158	5.984549144	4.174460903	0.000210578	0.040616467	0.653670252
ERFE	1.483206407	5.161368303	4.173581039	0.000211106	0.040616467	0.651414488
IGFBP7	1.072382721	10.05813108	4.151066122	0.000225076	0.042551095	0.593730947
ARHGEF28	1.42630915	5.235429806	4.119704068	0.000246058	0.044579544	0.513510183
CYP21A1P	-1.560022145	8.727148346	-4.109974206	0.000252949	0.045021857	0.488653594
FBLN2	-1.332338275	9.107287484	-4.10888554	0.000253732	0.045021857	0.485873349
RAB11FIP1	1.930929379	5.414376814	4.09694134	0.000262477	0.04528977	0.455382664
ALDH3A1	1.739608281	3.421156433	4.070048181	0.000283263	0.045606743	0.386816084
RAB11FIP1	2.086924013	4.991630748	4.06995866	0.000283335	0.045606743	0.38658804
NRP2	1.251043337	5.188991089	4.056101986	0.000294669	0.046335479	0.351306366
MRPL43	1.167084642	7.227017604	4.030624376	0.000316679	0.048485323	0.28652106
PDPN	1.149366146	9.062675927	4.021726716	0.000324738	0.04916265	0.263922329
AC026412.1	1.8296382	7.429419435	3.999279273	0.000345974	0.05082316	0.206971458
PTPRE	1.371428031	4.783043153	3.973463936	0.000372079	0.052736192	0.141588517
DUOX1	-3.421181506	2.600681883	-3.972061123	0.000373551	0.052736192	0.138039098
PPM1H	1.390850822	6.112308088	3.955094851	0.000391816	0.053868598	0.095139845
CRABP2	-2.331174924	7.273935022	-3.946504518	0.000401394	0.053868598	0.073439842
ZSWIM7	1.021577732	7.305958667	3.927911765	0.000422915	0.055397687	0.026521074
PHKA1	1.760056243	3.708224089	3.925716878	0.000425528	0.055397687	0.020986687
IL15	1.344870987	5.047610794	3.90339028	0.000453028	0.057263223	-0.035256027
OAF	-1.311981679	6.414236655	-3.886430176	0.000475069	0.058030175	-0.077913918
GDF5	1.472602707	5.784980885	3.880275867	0.000483323	0.058030175	-0.093378844
EFNB2	2.68639779	4.067971181	3.852581884	0.00052223	0.060236456	-0.16287399
AC026412.1	1.888866139	4.753059802	3.849270015	0.000527082	0.060312072	-0.171174137
NUAK2	1.186802921	7.111335223	3.843061895	0.000536297	0.061045162	-0.186726614
TMEM56	1.181887813	5.17630123	3.836897816	0.000545601	0.061780793	-0.202160724
HEBP2	-1.152437117	6.650614378	-3.826712496	0.000561321	0.062245377	-0.227645862
C1QTNF3	-1.612174568	5.822825731	-3.820643708	0.000570896	0.062245377	-0.242820297
AC005522.1	-1.409422086	3.697788193	-3.814069891	0.000581448	0.062580516	-0.259248563
VASH2	-2.081580062	3.793062896	-3.805853093	0.000594904	0.063713378	-0.279769546
SH3RF2	1.535653723	6.228603399	3.791821368	0.000618587	0.065925052	-0.314778846
OCIAD2	1.047989877	7.465207042	3.781012171	0.000637455	0.067604414	-0.34171825
ITGB8	1.16841863	7.885580643	3.724627383	0.000745315	0.071623741	-0.481815302
OR7E47P	-1.379466521	4.570207536	-3.720638387	0.000753584	0.071623741	-0.491698755
WNT9A	-1.113473963	5.785100813	-3.720237713	0.00075442	0.071623741	-0.492691289
TEK	-1.228616125	7.236472966	-3.714079198	0.000767375	0.07222293	-0.507942159
LINC01013	1.234199725	4.21896854	3.68578009	0.000829735	0.075478153	-0.577905388
SEMA3A	2.105059183	5.247044868	3.679146542	0.00084505	0.076042315	-0.594277379
RFPL1S	1.691484261	3.811980513	3.66859018	0.000869988	0.076042315	-0.62030891
HLA-DRB4	-2.914188736	1.946675628	-3.667347425	0.00087297	0.076042315	-0.623371686
SEMA5A	1.641795241	7.96871771	3.66385397	0.000881407	0.076042315	-0.631979282
TMEM35A	-1.379068243	4.200078823	-3.658635991	0.000894156	0.076234662	-0.644830341
LYPD6B	3.044566987	3.811045518	3.654044665	0.000905521	0.076602874	-0.656132451
HPSE	-1.245687721	5.646154216	-3.646724073	0.000923933	0.076722704	-0.674142092
H19	-2.389974597	7.526958321	-3.638111321	0.00094606	0.077157725	-0.695313373
KRTAP1-5	1.607398318	6.517193016	3.632788293	0.000959991	0.077349161	-0.708388704
TRAPPC12	-1.061094398	4.975207294	-3.631657214	0.000962977	0.077349161	-0.711166127
ARHGEF28	1.586824443	4.563451079	3.623090179	0.000985885	0.078513272	-0.732192331
PHACTR1	1.291042611	5.865380911	3.611006143	0.001019097	0.079418787	-0.761818361
MMP13	2.044591093	2.625280382	3.610495271	0.001020524	0.079418787	-0.763070017
ELFN1	-1.520863304	5.794531496	-3.605469315	0.001034674	0.079768935	-0.775380213
TOR4A	1.57391454	7.249067863	3.60199459	0.001044567	0.079964518	-0.783887103
NPR1	-2.020021643	2.83831771	-3.597771333	0.001056714	0.080563353	-0.794222324
TRH	-2.819678136	4.795809909	-3.591200965	0.001075885	0.0812181	-0.810292148
LIPH	1.59016946	3.686205132	3.586470963	0.001089894	0.08154193	-0.821853771
APCDD1L-DT	-1.646736416	4.128558727	-3.579187174	0.001111812	0.082373289	-0.839646096
SLC22A3	1.847242413	3.392183036	3.577908856	0.001115702	0.082373289	-0.842767231
LRRC8E	1.031117231	5.668919573	3.568904813	0.00114348	0.082373289	-0.864739106
STC2	1.152084592	5.721208257	3.568541891	0.001144614	0.082373289	-0.865624263
PPP2R2C	-1.05541906	3.393413911	-3.565650227	0.001153685	0.082373289	-0.872675687
EYA2	-1.381465663	5.101977491	-3.565043132	0.001155598	0.082373289	-0.874155827
BHLHE41	1.139506829	6.35554629	3.563351447	0.001160945	0.082484015	-0.878279742
LGR5	2.262989535	6.597718959	3.558495439	0.001176428	0.082562402	-0.890113228
CCL7	2.39834181	3.172930337	3.547980958	0.001210639	0.083693716	-0.915713837
HOXA13	1.110609752	5.244573923	3.546203156	0.001216517	0.083693716	-0.920039451
FCRLB	-1.367660564	4.982506504	-3.545860679	0.001217653	0.083693716	-0.920872642
THBS1	1.575563107	8.605924263	3.545058518	0.001220317	0.083693716	-0.922824042
CH25H	2.09900278	6.977550351	3.54067985	0.001234958	0.083714669	-0.933472837
PTGS2	1.317477309	6.486243826	3.539712988	0.001238213	0.083714669	-0.93582351
NOTCH3	-1.049083486	8.644192023	-3.535813912	0.001251427	0.083714669	-0.945300493
NHSL1	-1.263343388	7.307121175	-3.526087438	0.001284985	0.085173332	-0.968923125
AC005062.1	1.858726338	4.040719032	3.524530039	0.001290438	0.085274817	-0.97270314
AC011389.3	-2.325787165	1.518904367	-3.518346091	0.001312313	0.086196374	-0.987705755
SCARA5	-2.161030888	8.388571977	-3.513183569	0.001330849	0.086888837	-1.000222163
SCN1A	2.097817565	2.276762621	3.504342863	0.001363179	0.087725788	-1.021638884
RCAN1	1.20054775	5.450285165	3.497607508	0.001388317	0.087725788	-1.037940579
CHST2	1.23615715	5.60203453	3.497024524	0.001390514	0.087725788	-1.039350979
CPM	1.926883202	4.207685164	3.495086711	0.00139784	0.087725788	-1.044038401
BHLHE41	1.205035418	3.648177078	3.491225673	0.001412548	0.088247742	-1.053374776
AC132008.2	-1.069636136	5.253732266	-3.485236268	0.00143566	0.089043884	-1.067849342
ANKRD28	-1.188267025	8.892039867	-3.481350645	0.001450848	0.089043884	-1.077234218
THORLNC	1.461219279	4.599464678	3.479218091	0.00145925	0.089043884	-1.082383097
GNRH1	-1.158602041	4.368445451	-3.475941242	0.001472251	0.089408416	-1.090292233
PMEPA1	1.001782744	8.258595241	3.468206361	0.001503384	0.089962916	-1.108949163
KCNS3	1.82761257	2.785886184	3.466565404	0.00151007	0.089962916	-1.112905007
CCN6	3.494085969	3.512518451	3.459582138	0.001538845	0.090177988	-1.129730763
HS3ST3B1	1.028948862	7.843375732	3.433952089	0.00164905	0.094444547	-1.191362197
FOLR3	-1.738686652	4.652142813	-3.430200761	0.001665804	0.09455939	-1.200366528
ARFGEF3	3.019093846	3.870229693	3.426158158	0.001684043	0.094606643	-1.210065304
AC005062.1	1.97536623	5.044511342	3.422163109	0.001702255	0.094697565	-1.219645184
TSLP	1.685493749	3.900545044	3.414595894	0.001737274	0.094697565	-1.237777741
RNF144B	1.034947242	8.640736836	3.413675356	0.001741581	0.094697565	-1.239982355
UPP1	1.060082163	5.244084321	3.413066897	0.001744433	0.094697565	-1.241439426
ZNF385B	2.939228304	1.840654803	3.412921752	0.001745114	0.094697565	-1.241786988
ADCY2	1.508228392	3.661701333	3.411323735	0.00175263	0.094697565	-1.245613136
ANOS1	2.284118977	5.521590962	3.408718965	0.001764947	0.094697565	-1.251848108
FBN2	1.354616803	8.418209644	3.403931077	0.001787805	0.094697565	-1.263303377
TOR4A	1.526762462	6.950737823	3.396060386	0.001826001	0.095158288	-1.282119233
GPR4	-1.714382895	2.90309608	-3.393587663	0.001838162	0.095158288	-1.288026671
HTR2A	1.408036773	6.095899042	3.39325047	0.001839827	0.095158288	-1.288832092
KCTD4	2.016901847	3.320059203	3.387523667	0.001868316	0.095799662	-1.302505855
AC105052.4	-1.06237702	5.094563173	-3.375068809	0.001931746	0.097246687	-1.332209085
NRP2	1.489336616	3.465720738	3.374957962	0.00193232	0.097246687	-1.332473225
MIR1915HG	-1.0953191	6.274546405	-3.355345149	0.002036447	0.100852819	-1.379148571
PIEZO2	2.242872728	4.407529709	3.353323625	0.00204748	0.10093939	-1.3839526
XPNPEP3	-1.715306758	3.165596695	-3.347816208	0.002077832	0.100991194	-1.397034087
AJAP1	-2.123597154	2.582379225	-3.335118576	0.002149464	0.10165481	-1.427157378
SPECC1	1.224312681	3.899219392	3.335089246	0.002149632	0.10165481	-1.427226899
MYRIP	1.825726058	4.939822278	3.327072849	0.002196072	0.102053541	-1.446218004
LRRTM2	-1.061142794	6.063503658	-3.326945196	0.00219682	0.102053541	-1.44652025
PRKAR2B	1.391673583	4.276341631	3.309398925	0.002301882	0.105137028	-1.488014799
TMTC2	1.425484765	5.204538553	3.301322427	0.002351845	0.106523885	-1.507080939
TMEM196	3.271262765	5.989867211	3.287254021	0.002441365	0.107444786	-1.540240958
SLC19A3	1.905449945	3.094076795	3.285526846	0.002452578	0.107539643	-1.544307498
APELA	2.061532487	3.238394897	3.277269722	0.002506867	0.109169191	-1.563734755
TMEM196	2.202391365	3.881108666	3.276696936	0.002510675	0.109169191	-1.565081557
CATSPER2	-1.252864132	2.927824528	-3.272664573	0.002537643	0.109966684	-1.574559817
RAB3IP	1.85481378	3.920174633	3.270430943	0.0025527	0.110245079	-1.579807727
NEDD4L	1.026478552	5.700960405	3.268941912	0.002562785	0.110245079	-1.583305275
GTF2H2C	-1.000909989	5.706991388	-3.265052898	0.002589305	0.110541343	-1.59243657
SLIT3	-1.512106822	7.762828569	-3.264953004	0.00258999	0.110541343	-1.592671051
MSX2	1.107512449	7.95458447	3.262045456	0.002609993	0.110827853	-1.599494469
AC090152.1	1.558267999	5.334433573	3.258446933	0.002634955	0.111242192	-1.607935512
MMP3	3.265289461	6.420581292	3.256395628	0.002649287	0.111242192	-1.612745293
NXN	1.011501344	8.273489817	3.24486205	0.002731263	0.112485239	-1.639761973
PPARGC1A	1.59845575	7.843226335	3.239574651	0.00276965	0.112762091	-1.652132216
MDM2	1.241052513	4.674570692	3.234755167	0.002805088	0.112934077	-1.663399395
GALNT3	1.246635399	3.448136762	3.23264374	0.00282075	0.112934077	-1.668333059
APCDD1	2.358523938	5.007506798	3.230232193	0.00283874	0.113242267	-1.673966119
FRMPD4	1.683268396	4.24397746	3.22266704	0.002895889	0.114057103	-1.691624311
KIT	2.446652321	2.792776178	3.217062075	0.002938937	0.114713529	-1.704694343
NAA25	-1.086092108	3.88488613	-3.205696266	0.003028114	0.116106655	-1.731164304
PIEZO2	2.143903091	6.114117457	3.202095851	0.003056898	0.116596517	-1.739539923
SPECC1	1.069473334	7.003782291	3.198721663	0.00308411	0.11742842	-1.747385135
ALPK2	1.192864145	6.351018891	3.183312764	0.003211342	0.12079202	-1.783160736
STK26	1.117840682	6.999108117	3.18214088	0.00322122	0.120954325	-1.785878109
AC090229.1	1.24344973	3.716993807	3.177604007	0.003259738	0.121765936	-1.796393631
NRG2	1.116309101	3.771870077	3.176792272	0.003266676	0.121765936	-1.798274287
NRP2	1.093262187	5.300473808	3.168458604	0.00333872	0.12344747	-1.817568379
RASSF2	-1.38429571	8.138116758	-3.157098526	0.003439369	0.12418369	-1.84382897
OLFM4	2.275737084	4.195532856	3.153756915	0.003469521	0.12418369	-1.851544741
ARHGEF28	1.440621116	3.474324346	3.14942616	0.003508973	0.12418369	-1.861538413
MAOB	1.671258288	4.820911334	3.143725301	0.003561558	0.12418369	-1.874683331
TNFRSF11B	1.007582862	7.293370995	3.142346369	0.00357439	0.124337285	-1.877861062
PAQR5	1.747091036	2.398969999	3.137062144	0.00362397	0.125628642	-1.890032039
ZFP14	-1.033839544	3.645536022	-3.128052353	0.003710018	0.125647162	-1.910760332
NHSL2	-1.550765416	5.786406622	-3.127934344	0.003711158	0.125647162	-1.91103163
HTRA3	-1.088553297	6.65511744	-3.121901047	0.003769879	0.126363843	-1.924895073
HMBOX1	-1.024475503	5.085841853	-3.118767595	0.003800724	0.126451241	-1.932089867
NRCAM	1.51084707	3.243626201	3.108441366	0.003904079	0.128162656	-1.955774315
NCAM1	1.528427544	1.500293886	3.103480641	0.003954676	0.128481446	-1.967138172
EMX2OS	-1.071692534	5.128129012	-3.099491356	0.003995816	0.129275463	-1.97626999
INHBA	1.587837047	1.7164867	3.099490999	0.003995819	0.129275463	-1.976270806
BCL11B	-1.770096069	2.017342296	-3.092141504	0.004072678	0.130295824	-1.993078753
MAP7	1.347531503	3.86771786	3.089598894	0.004099594	0.130583716	-1.998888833
AC037198.1	1.288526022	5.31888342	3.08090645	0.00419289	0.131441515	-2.018733299
CPM	1.442357784	5.04924902	3.080691533	0.004195222	0.131441515	-2.01922358
AS3MT	1.093109089	8.182785923	3.080111218	0.004201525	0.131441515	-2.020547345
CLEC3B	-1.100399353	8.778731077	-3.078991712	0.00421371	0.131441515	-2.023100701
NAMPT	1.365984899	4.746965862	3.078418595	0.004219961	0.131441515	-2.024407675
CDH10	-2.079918038	3.397423167	-3.075918415	0.004247333	0.13184102	-2.030107783
RSPO3	2.07596684	6.107531392	3.070134329	0.004311305	0.132963388	-2.04328565
LRRN1	2.001464911	4.375398046	3.064344256	0.004376258	0.134384504	-2.056464311
GSTT2	2.042053048	1.646573904	3.062562008	0.004396437	0.134481069	-2.060518254
PAX9	1.833382207	2.421626404	3.053207359	0.004503809	0.136050365	-2.081776462
ADAM23	-1.311427565	6.008160255	-3.050735033	0.004532599	0.136057738	-2.087389106
AL928654.3	-1.457853961	7.7845987	-3.04127048	0.004644432	0.137861476	-2.108853464
ITGA6	-1.179173446	7.266211234	-3.030783262	0.0047714	0.139563181	-2.132596242
SLIT3	-1.501574658	5.323275279	-3.024521843	0.004848767	0.140127502	-2.146751339
DCLK1	-1.485066207	7.071095116	-3.024200954	0.004852763	0.140127502	-2.147476353
TENT5C	1.410963809	4.364290797	3.018246681	0.004927493	0.140127502	-2.160921989
ANK3	1.266921065	6.604723188	3.017286611	0.004939644	0.14019948	-2.163088656
DPYSL4	1.795886987	4.651704157	2.9984556	0.005183785	0.143880243	-2.205512016
STAT4	1.396813218	6.118200944	2.994820876	0.005232203	0.144320673	-2.213684168
SAMD4B	-1.043674137	5.547229837	-2.992402575	0.005264654	0.144526306	-2.219118429
CXCL8	2.191927821	6.314922416	2.990120967	0.005295445	0.144997828	-2.224243366
NRN1	1.921110785	7.067699356	2.982487897	0.005399698	0.146364213	-2.241373458
MME	1.003825269	8.942684925	2.981234872	0.005416996	0.146364213	-2.24418324
KANSL1	-1.404954249	3.261036642	-2.975908152	0.005491117	0.146566532	-2.25612076
AC025171.4	-1.344530542	3.372688133	-2.973281803	0.005528014	0.146566532	-2.262002333
CBFA2T2	-1.193198337	3.981089879	-2.971020977	0.005559964	0.146876268	-2.267063087
AC023794.2	-1.364469777	4.542499715	-2.967989454	0.005603078	0.147656386	-2.273845738
ARAP3	1.002979575	5.487152664	2.957442461	0.005755549	0.148595793	-2.297414012
NKX3-1	1.118785673	4.220899641	2.952811367	0.005823728	0.149308419	-2.307748208
RF00019	-1.151943533	3.20682837	-2.950905249	0.00585201	0.149308419	-2.311999106
CCL8	2.337600792	6.383076868	2.950498633	0.00585806	0.149308419	-2.312905719
TSHZ2	-1.056656723	4.535668754	-2.938670618	0.00603665	0.151375797	-2.339248189
AC140134.1	1.161025531	4.216812492	2.936542932	0.006069316	0.151433836	-2.34398065
EDNRB	1.407408717	5.824777558	2.924226631	0.006261701	0.153329745	-2.371337821
AKAP10	-1.068658156	4.919115981	-2.908627202	0.006513618	0.156172131	-2.405896147
ADAM23	-1.516292425	6.456812169	-2.904581612	0.006580492	0.15622732	-2.414841795
AL031058.1	-1.391368189	5.625020417	-2.89286854	0.006777771	0.1586187	-2.440702631
ARAP2	2.147303573	1.914037739	2.888189138	0.006858128	0.159170179	-2.451017737
LHX9	2.185454628	2.94504643	2.886837897	0.006881499	0.159312623	-2.453994617
CFAP69	1.151569755	4.765221114	2.885539183	0.006904031	0.159360604	-2.45685504
GPM6B	1.735058427	6.768990624	2.885493788	0.00690482	0.159360604	-2.45695501
CILP	-1.5153303	3.949068627	-2.883980102	0.006931172	0.159629894	-2.460287968
VTI1A	-1.456046563	2.99181264	-2.879053195	0.007017604	0.160938524	-2.471129613
FGL2	-1.461828463	6.031654043	-2.871226464	0.007156991	0.162252486	-2.488330801
CCDC85C	1.317134994	5.968923395	2.867642597	0.00722168	0.162568607	-2.496198399
XPNPEP2	-2.045369876	3.825727217	-2.849726637	0.007553382	0.167398659	-2.535445228
HOPX	2.299527453	2.092014759	2.84532479	0.00763704	0.167985064	-2.545066475
LINC01616	1.793813289	4.416882145	2.84428312	0.007656963	0.168083749	-2.54734204
SPATA17	-1.312529899	1.650772445	-2.843096036	0.007679728	0.168083749	-2.549934685
ST3GAL6	1.101656526	5.005881561	2.839912745	0.007741087	0.168805385	-2.556884075
IFITM1	1.05214866	9.292903764	2.833051737	0.007874902	0.169652881	-2.571847034
IL6	1.938325192	6.958539453	2.831520968	0.007905052	0.169652881	-2.575182603
CXCL3	1.835652594	4.865686047	2.830667227	0.007921914	0.169652881	-2.577042465
CPM	1.20801313	3.774688028	2.828348573	0.00796788	0.169701166	-2.582091993
KIAA1549L	-1.189584199	4.235352155	-2.821856433	0.008097915	0.17092891	-2.596217772
LRRFIP2	-1.095532676	4.769881978	-2.818903298	0.008157721	0.171386743	-2.602637077
EDNRB	1.698520728	4.277483002	2.816638087	0.008203876	0.171830885	-2.607558391
NRK	2.185376987	1.631539603	2.805349838	0.008437545	0.17329263	-2.632048598
STARD4	1.211405653	3.937356552	2.802566378	0.008496112	0.173494566	-2.638078612
NR2F1	1.250232735	5.626992889	2.796975311	0.008614908	0.175120955	-2.650180407
PAX1	-1.488044435	0.065400153	-2.796040506	0.008634921	0.175120955	-2.652202407
HOTAIR	-1.184053638	4.191654336	-2.782879048	0.008921347	0.17705448	-2.680628832
TAFA5	-1.555553728	1.756005113	-2.778791659	0.00901209	0.177313899	-2.68944085
DCLK1	-1.253466846	7.131081498	-2.761399998	0.009407925	0.181973046	-2.726850176
MAK	-1.513197019	3.207643311	-2.754216935	0.0095761	0.183748461	-2.742260301
ANK3	1.663852002	3.479279013	2.751758351	0.009634304	0.184171012	-2.747529328
RGS4	1.173113129	8.053534737	2.75115548	0.009648626	0.184171012	-2.748820921
GPM6B	1.872516476	5.647634348	2.738459889	0.009954887	0.185935742	-2.775980823
PMAIP1	1.20579962	4.344659502	2.737167114	0.009986577	0.186367522	-2.77874227
PI16	-2.491992324	3.876623544	-2.735796165	0.010020285	0.186676107	-2.781669848
TOX	1.279163768	6.631838619	2.734255584	0.010058291	0.18708501	-2.784958618
GDF7	2.504379956	3.485820337	2.732867279	0.010092655	0.187382075	-2.787921363
NTNG1	-1.125955334	4.52882871	-2.731311362	0.010131298	0.187778812	-2.791240732
C11orf87	-1.523456724	5.194690336	-2.72667823	0.010247185	0.188960176	-2.801118267
KIF13A	-1.229689677	3.818815157	-2.724020911	0.010314208	0.188983619	-2.806778951
ABCC3	1.439486873	4.660426705	2.723906781	0.010317095	0.188983619	-2.807021998
ZNF814	-1.206530256	3.664238431	-2.722700757	0.010347656	0.188983619	-2.809589938
MMP1	2.222028347	8.124213598	2.722623208	0.010349624	0.188983619	-2.809755037
HTR2A	1.20430521	5.758104125	2.719094689	0.010439537	0.189770888	-2.817264114
SLC7A2	2.274141856	3.514255539	2.713151817	0.010592619	0.190798779	-2.829897925
TENM2	2.682840723	3.213750243	2.707910765	0.010729353	0.191831307	-2.841025887
SLC2A5	2.090560985	6.269633119	2.705568477	0.010790991	0.19214327	-2.845994894
DOCK7	-1.063727072	3.143635402	-2.702756542	0.010865422	0.192836855	-2.851956783
ARID1B	-1.070647256	3.317192424	-2.701844634	0.010889663	0.193109428	-2.853889411
EDNRB	1.574263645	4.022014918	2.699940747	0.010940434	0.193693797	-2.857923086
SLC2A1	1.16362095	5.853223851	2.69586715	0.011049806	0.194994998	-2.866547818
PALMD	2.052808339	3.977253004	2.672487511	0.01169743	0.200486864	-2.91589405
TNC	1.08891515	4.461092977	2.663180489	0.011964909	0.202750659	-2.935464539
ITGB8	1.111018633	4.580566283	2.662575178	0.011982501	0.202851881	-2.936735911
TENT2	-1.217409295	4.805013187	-2.660825598	0.012033482	0.202851881	-2.940409659
FAM160A1	1.660059396	2.46116349	2.655681636	0.012184539	0.2041168	-2.951202258
MARVELD2	1.141866559	7.397097354	2.653609833	0.012245874	0.204640698	-2.955545484
COL4A5	1.394108096	2.581721185	2.649069489	0.012381293	0.205953854	-2.9650563
PPP1R13L	1.048399841	4.977544606	2.646664981	0.01245357	0.20620074	-2.970089022
NBR1	-1.117017923	3.971185871	-2.641690884	0.012604329	0.207741445	-2.98049098
FAM131B	-1.093970783	5.870377896	-2.640318075	0.012646233	0.208131538	-2.983359694
PALMD	1.206394752	5.47845606	2.632044242	0.012901536	0.21003306	-3.000629591
LMCD1	1.298998491	3.683642829	2.630659141	0.012944739	0.21003306	-3.003517398
AQP3	-1.447496504	7.362252588	-2.615440013	0.013428342	0.213566635	-3.035185252
TNIK	1.181108121	3.001356839	2.613441357	0.013493078	0.214148501	-3.039335484
SLC16A6	1.461708876	4.187078902	2.612266463	0.013531268	0.214261622	-3.041774236
SULT4A1	1.023264736	3.758232057	2.611960023	0.013541245	0.214261622	-3.042410208
CCDC3	-1.354299712	2.959136539	-2.61136192	0.013560737	0.214261622	-3.043651347
HLA-DPA1	-1.40095158	7.693716858	-2.6085766	0.013651855	0.214840726	-3.04942888
GPM6B	1.845039224	4.785544261	2.608429588	0.01365668	0.214840726	-3.049733716
ARFGEF3	2.047432919	2.934056871	2.60517367	0.013763945	0.215747608	-3.056482242
WNT16	-1.301121187	3.732381653	-2.604567572	0.013783999	0.215906278	-3.057737911
LINC00960	-1.640181421	5.657474014	-2.6039441	0.013804655	0.216013119	-3.059029384
SCARA5	-1.523668501	9.884784009	-2.603462616	0.013820627	0.216013119	-3.060026606
HLA-DPA1	-1.410136007	4.710600948	-2.603155803	0.013830813	0.216017035	-3.060661998
AC009022.1	-1.1266436	3.684788787	-2.602549704	0.013850957	0.216119185	-3.061917059
RPS28	-1.077642665	3.026249089	-2.602360969	0.013857235	0.216119185	-3.062307838
CXCL1	2.434582858	7.366071326	2.601480953	0.013886542	0.216240758	-3.064129689
MASP1	-1.351103607	5.738697524	-2.600284901	0.013926467	0.216321811	-3.06660519
LMCD1	1.12577096	5.126811176	2.596942713	0.014038592	0.217078974	-3.0735188
TDRD9	-1.359046831	3.463731886	-2.593067127	0.014169656	0.217777501	-3.081528748
CDO1	1.191431337	6.225664557	2.590018501	0.014273547	0.21807533	-3.087824239
TMEM176A	-2.800140937	4.273413542	-2.586334053	0.014400044	0.219277713	-3.095426454
THBS1	1.036830151	6.956278088	2.577849875	0.014695273	0.220473011	-3.112905936
SOX6	1.418050956	3.920733294	2.571981981	0.014902716	0.221687946	-3.124973843
AC021078.1	-1.362406518	3.397708023	-2.563843386	0.015194905	0.224119691	-3.14168261
RERG	2.182954315	3.199657318	2.554397123	0.015540656	0.225750424	-3.161033536
SHB	1.004228091	3.75254891	2.553048241	0.015590614	0.225750424	-3.163793018
AC008132.1	1.695488274	4.627222765	2.55137088	0.015652945	0.225750424	-3.16722318
RNU6-37P	-1.459946469	2.249540753	-2.548890056	0.015745553	0.226495709	-3.17229375
TNFRSF11B	1.007275867	7.606287617	2.548011385	0.015778474	0.226578474	-3.174088909
ZNF207	-1.131619038	3.627086554	-2.542263365	0.015995403	0.227794386	-3.185822504
DEPTOR	-1.320396233	7.466675745	-2.538981963	0.016120469	0.228416039	-3.192513261
PGR	1.601180295	2.383810841	2.538411307	0.016142311	0.228483056	-3.193676255
CEPT1	-1.113107426	3.969150843	-2.535511053	0.016253737	0.229387842	-3.199584346
TAFA5	-1.050740337	4.774123095	-2.533849939	0.016317874	0.229474059	-3.202966227
NETO2	1.100238042	5.151082257	2.529478594	0.016487769	0.230818152	-3.211859041
KRT223P	-1.821363427	3.563493636	-2.528762293	0.016515763	0.230928987	-3.213315293
NXPH2	1.721272463	1.777425851	2.521170311	0.016815166	0.234045145	-3.228733485
GSDMB	-1.044026371	3.865192737	-2.520069987	0.01685897	0.234346744	-3.230965584
POSTN	1.602596611	6.382981389	2.516280012	0.017010655	0.235259949	-3.238649005
COL4A4	2.195048123	1.904255109	2.508799836	0.017313714	0.236529106	-3.253791465
COL15A1	-1.644673218	8.272010263	-2.507078951	0.017384133	0.236571044	-3.257270968
RTN1	1.256248474	2.95796728	2.501242186	0.017624937	0.238026447	-3.269060857
IGFBP5	-1.008471578	7.71850632	-2.495564174	0.017862124	0.240161064	-3.280512805
PDGFRA	-1.151661062	2.627943234	-2.493575699	0.017945878	0.240416949	-3.284519315
STC1	1.88338213	6.079979849	2.49350459	0.01794888	0.240416949	-3.284662551
PTPN22	1.322433898	3.478625826	2.491630903	0.01802814	0.24100297	-3.288435788
FAM167A	-1.019574321	4.338028381	-2.489103848	0.018135548	0.241448219	-3.29352183
NPAS3	1.147884746	3.417695386	2.488684867	0.018153412	0.241538148	-3.294364759
BCL11B	-1.54862767	0.537861448	-2.486687518	0.018238797	0.242070677	-3.29838185
C11orf87	-1.553996794	6.486114962	-2.478678169	0.018584898	0.243552905	-3.314469
BAIAP2L1	1.686996142	2.927214568	2.47720064	0.018649399	0.243801464	-3.317432945
KIAA1549L	-1.497892946	4.922275811	-2.476959737	0.018659934	0.243801464	-3.317916091
TGM2	2.330078781	4.855200863	2.474168095	0.018782425	0.244227689	-3.323512623
CDCP1	1.12914126	5.368638291	2.469268308	0.018999196	0.245729824	-3.333325359
NOX4	1.606064178	4.46749354	2.465733082	0.019157017	0.246008686	-3.340397311
ESCO2	-1.195929305	4.650399959	-2.456073207	0.019594391	0.24839375	-3.359686868
HERC6	1.284715596	5.977206892	2.455330953	0.019628373	0.24839375	-3.361166972
DOK6	1.674828765	3.133463836	2.447808473	0.019975822	0.249788291	-3.37615051
TRPC6	1.662997391	0.461764445	2.447475391	0.019991336	0.249788291	-3.376813245
COL11A1	1.00383712	6.060699608	2.443288261	0.020187295	0.251082368	-3.385139275
SMAGP	-1.177584008	4.828467636	-2.427274797	0.020953018	0.257512471	-3.416893691
ST3GAL6	1.122989373	7.15547547	2.42246849	0.021187959	0.259852849	-3.426397165
ADAMDEC1	1.383168125	2.349947408	2.420088515	0.021305183	0.259852849	-3.431098379
AC005747.1	-1.204424665	3.556774076	-2.419632315	0.021327721	0.259852849	-3.431999166
ADGRF5	-1.371133618	0.430774398	-2.418470923	0.021385194	0.259852849	-3.434291866
RNF175	1.258618473	2.12486958	2.416215617	0.021497205	0.260518802	-3.438741942
LGR5	1.289131543	2.313910324	2.409104713	0.02185388	0.262198332	-3.452754531
THBS1	1.000832245	8.443809934	2.400508575	0.022292244	0.263973678	-3.46965659
MRVI1	-1.157611971	6.813755194	-2.385005154	0.023103125	0.269033228	-3.500036297
FGFBP2	-1.313974224	2.982399146	-2.383510343	0.023182709	0.269092645	-3.502958369
TNFAIP6	1.41492524	8.01868169	2.373981424	0.023695912	0.271486074	-3.521556201
BAALC	-2.209191243	3.070391992	-2.371755624	0.023817265	0.271875477	-3.525893012
LINC00960	-1.434301829	3.722221317	-2.367384544	0.024057223	0.273152877	-3.53440164
AL807752.7	1.091949706	8.298533057	2.366507511	0.024105633	0.273152877	-3.536107553
CP	1.921489635	6.406966316	2.355544014	0.02471829	0.275617767	-3.55739597
INHBA	1.007617674	4.443478872	2.34918754	0.025079931	0.277055876	-3.569707524
FGL2	-1.319715966	7.929244343	-2.345589717	0.025286741	0.278039145	-3.576665809
FRZB	1.296516893	0.974562318	2.345206867	0.025308839	0.278039145	-3.577405818
CELSR1	1.377936921	3.49220102	2.342546615	0.02546287	0.278605056	-3.582545498
CD34	-1.956160658	6.387096367	-2.327100907	0.026374076	0.282590762	-3.612307201
STXBP6	-1.684415654	3.730044876	-2.325849269	0.026449192	0.282590762	-3.614712948
MASP1	-1.251894699	3.333403571	-2.325078997	0.026495516	0.282787926	-3.616193023
BAALC	-1.487724187	2.821023417	-2.322740806	0.026636581	0.283436775	-3.620683763
GAP43	1.030331979	5.649929317	2.319620707	0.026825878	0.284220957	-3.626671343
HOXB2	1.776399919	2.168549302	2.318961673	0.026866016	0.284369065	-3.627935335
ICAM1	1.024759088	6.207088291	2.316277791	0.02703004	0.285271897	-3.633080296
SPINK13	1.693524335	5.870164987	2.313192236	0.02721973	0.285286206	-3.638990122
PLP1	-1.367795283	4.13748303	-2.310659182	0.027376351	0.285286206	-3.643837621
LYPD6	1.467307036	3.665813566	2.31029698	0.027398813	0.285286206	-3.644530464
SPOCD1	1.018402934	4.961755987	2.307883169	0.02754893	0.285812084	-3.649145812
ADAM33	-1.039485359	4.448956309	-2.301620068	0.027941904	0.286745733	-3.661105484
AIF1L	-1.619024238	7.426684479	-2.301348465	0.027959059	0.286745733	-3.661623608
PTGER4	1.151167031	9.236900422	2.301218978	0.027967241	0.286745733	-3.661870609
SEMA3A	1.267042811	3.354108085	2.301108432	0.027974228	0.286745733	-3.66208147
CP	1.320776304	6.449594507	2.299800063	0.028057043	0.287053261	-3.664576597
VLDLR-AS1	-1.37118742	2.053844546	-2.29746268	0.028205542	0.287600269	-3.669031631
TRIM9	1.335793125	3.394719131	2.297293202	0.028216337	0.287600269	-3.669354531
ACE	-1.491990708	3.640723577	-2.296753284	0.028250751	0.287816111	-3.670383106
VEPH1	1.050578273	5.364857987	2.288528337	0.028779712	0.290752659	-3.6860311
SFTA1P	1.011686826	4.063030823	2.287068001	0.028874557	0.291034647	-3.688805269
BST2	1.374715257	2.510005966	2.285134987	0.029000533	0.291486372	-3.692475457
AR	-1.252816168	5.281083679	-2.284885584	0.029016823	0.291486372	-3.692948836
FRMD4B	1.316122031	3.542338561	2.279789013	0.029351518	0.293230559	-3.702614401
WWOX	1.133128929	3.959575551	2.279304586	0.029383511	0.293230559	-3.703532318
SLC29A4	-1.070005984	3.341023733	-2.274961134	0.029671769	0.294160483	-3.71175635
TMEM255A	-1.124976789	4.14114152	-2.274261835	0.029718416	0.294384076	-3.713079391
ADRA2A	1.306564383	5.913665631	2.267957637	0.030141929	0.295586679	-3.724993641
COL13A1	-1.322906584	3.42868727	-2.267560501	0.030168789	0.295618009	-3.725743401
ELP5	-2.319976303	3.673725497	-2.266216394	0.030259857	0.29584521	-3.728280277
FAM160A1	1.545797406	2.373865386	2.261025516	0.030613883	0.297749049	-3.738067555
PITPNB	-1.06350744	3.770347157	-2.252187977	0.03122519	0.301704161	-3.754693857
ZMAT1	1.091832306	3.945094713	2.251697065	0.031259467	0.301704161	-3.755616066
TOX	1.226592488	3.752983796	2.251613179	0.031265327	0.301704161	-3.755773637
AC007877.1	1.498475856	1.175633237	2.250977394	0.031309776	0.301999045	-3.756967753
CXCL6	2.15278472	6.195164413	2.250486919	0.031344106	0.302196097	-3.757888788
SLC38A9	-1.066863258	4.259539017	-2.249179723	0.031435763	0.302543131	-3.760342801
HCLS1	-1.410743043	4.151407387	-2.240024256	0.032084499	0.305808455	-3.777501943
AC099668.1	1.058981682	4.042938756	2.239059954	0.032153521	0.306184389	-3.779306326
FABP3	-1.139009648	6.02898979	-2.23825321	0.032211368	0.306286001	-3.780815464
P3H2	1.100387589	7.52283702	2.226991873	0.033028657	0.309207962	-3.80184086
SERPINA1	1.932153136	1.751019144	2.226987935	0.033028946	0.309207962	-3.801848198
VSTM2L	-1.047164305	3.417798118	-2.225646592	0.033127523	0.309207962	-3.804347475
TP53TG3	-1.646913849	5.436195247	-2.224453094	0.033215456	0.309797177	-3.806570368
CACNA2D3	1.387026005	2.571633187	2.219655749	0.03357102	0.311205424	-3.815496797
FMO2	2.242301479	6.717907295	2.215177051	0.033906038	0.311955637	-3.823817813
RASGRP3	-1.275121192	1.231541429	-2.21399931	0.033994631	0.312165115	-3.82600394
DSP	-1.146117003	6.283611558	-2.210627241	0.034249436	0.312785845	-3.832258556
REEP1	-1.136203685	2.449139615	-2.209894566	0.034305024	0.312846282	-3.833616636
MIA	1.839486183	2.745800135	2.209123185	0.034363637	0.313039825	-3.835046111
LGI1	-1.592242631	4.129924981	-2.208383597	0.034419918	0.313039825	-3.83641633
TSPAN18	-1.144789264	1.812922775	-2.208101111	0.034441436	0.313039825	-3.836939598
HLA-DRA	-1.762897647	3.45406425	-2.203109987	0.034823621	0.314794074	-3.846177035
TSHZ2	-1.040246738	6.114061408	-2.194164393	0.035518106	0.316604815	-3.862695474
STC1	2.412440409	3.772084981	2.192514487	0.035647538	0.317291153	-3.865736783
SLC1A2	-1.276452391	4.427996405	-2.18790312	0.036011526	0.319171053	-3.874228223
MCOLN2	1.673467361	2.30419972	2.18695548	0.036086736	0.319418024	-3.875971613
SOX6	1.356715104	3.848150856	2.183230901	0.036383697	0.31981346	-3.882818477
IRX1	1.167368162	2.52585263	2.178170926	0.03679062	0.321261848	-3.892106592
TAFA5	-1.382378029	2.677050989	-2.177126573	0.036875111	0.321261848	-3.894021659
C11orf87	-1.505081082	4.868340016	-2.171021191	0.037372519	0.323582608	-3.90520392
MEGF10	1.494856879	0.456910481	2.167902551	0.037628895	0.324181442	-3.910906998
LRRN3	-1.009164465	7.135994884	-2.164120066	0.037941945	0.324867242	-3.917816018
SAMD5	1.738780456	0.421583663	2.163810265	0.037967687	0.324867242	-3.918381504
CXCL9	2.074959441	1.332297578	2.16379246	0.037969167	0.324867242	-3.918414003
FILIP1	1.436050985	3.895694768	2.162989952	0.038035925	0.324926933	-3.919878553
PTGER3	1.209128999	1.646604931	2.162346566	0.038089522	0.325129285	-3.921052426
LRRC17	-1.258991824	6.907139117	-2.157234489	0.038517772	0.326508488	-3.930370434
FAT3	-1.526449402	6.098065945	-2.156150116	0.038609161	0.326508488	-3.932344892
SGCA	-1.656658044	4.080849637	-2.156120066	0.038611696	0.326508488	-3.932399599
GPM6B	1.273391904	4.658794629	2.149304407	0.03919057	0.328973812	-3.944792953
NOX4	1.181981526	2.903866055	2.148598068	0.039251	0.329225709	-3.946075688
ASPA	-1.375186646	6.681980597	-2.147180354	0.039372541	0.329512984	-3.948649369
MX1	1.203464308	5.477367778	2.146645792	0.039418457	0.32959687	-3.949619475
GPAT3	-1.098528646	6.659036538	-2.13979015	0.040011539	0.331380978	-3.962045123
WWC1	1.52756751	3.970937968	2.139102422	0.040071469	0.331504495	-3.963289996
F2RL1	-1.231236213	1.111818139	-2.136106606	0.040333463	0.332659268	-3.96870935
FGF13	1.601036957	6.420901187	2.132462607	0.040654192	0.333625069	-3.975293703
RIPOR2	-1.070641071	5.51927899	-2.128896472	0.040970256	0.33473669	-3.981729329
CDK15	-1.176900978	2.506066761	-2.12353929	0.041449155	0.335747418	-3.991382205
CORIN	-1.073833089	0.954928592	-2.115298045	0.042195559	0.338375843	-4.006196594
HES1	-1.591000867	3.835379865	-2.115146087	0.042209433	0.338375843	-4.006469351
PCDHB4	1.263755751	4.231653582	2.108809049	0.042791614	0.339825374	-4.017831083
FP236383.2	1.08570984	3.566496316	2.10096113	0.04352244	0.342939194	-4.031866552
KIF13B	1.034501666	4.417423157	2.099766887	0.043634614	0.342939194	-4.03399896
GRIA1	1.397745888	5.792033308	2.099181483	0.043689694	0.342939194	-4.035043912
HAPLN1	1.862221992	7.828866219	2.094795026	0.044104368	0.343961364	-4.042866865
NEDD9	1.085788003	4.740523852	2.084919339	0.045050716	0.34737832	-4.060434759
VASH2	-1.111390875	3.479896182	-2.084237086	0.045116751	0.34737832	-4.06164613
XPNPEP2	-1.217674518	5.54599213	-2.082253047	0.045309269	0.347589564	-4.065167191
AC018816.1	1.17873284	1.810489879	2.079360616	0.045591231	0.348768107	-4.070295871
HLA-DRB1	-1.180697381	5.406890018	-2.077561518	0.045767392	0.349229425	-4.073483226
PCBP2	-1.188029185	3.052988746	-2.076196096	0.045901489	0.349461875	-4.07590088
CDS1	-1.253443763	2.400341791	-2.074840448	0.046034968	0.349701694	-4.078300051
PCSK1	1.345911302	7.255440361	2.072665882	0.046249795	0.349856919	-4.08214605
IL20RB	-1.379494585	4.387270057	-2.058787233	0.047641799	0.352383841	-4.106620776
LIPG	1.167224132	0.789455635	2.056108872	0.047914638	0.35335853	-4.111329755
GREM2	-1.222987973	6.781184015	-2.05392076	0.048138555	0.353933151	-4.115173366
C8orf34	1.071362678	4.586884492	2.04941801	0.048602235	0.355130424	-4.123073117
PSG1	1.843775578	2.975470527	2.045574628	0.049001115	0.356466335	-4.12980569
